# Supplementary material for: Endurance training slows breast tumor growth in mice by suppressing Treg cells recruitment to tumors
Source: PubMed Central journal article supplement (PMC6549262; doi:10.1186/s12885-019-5745-7), 2019-06-04

A

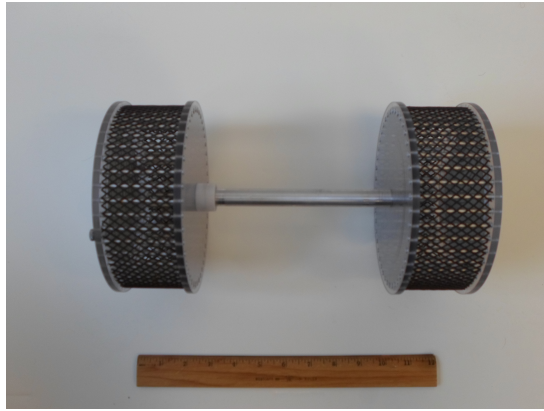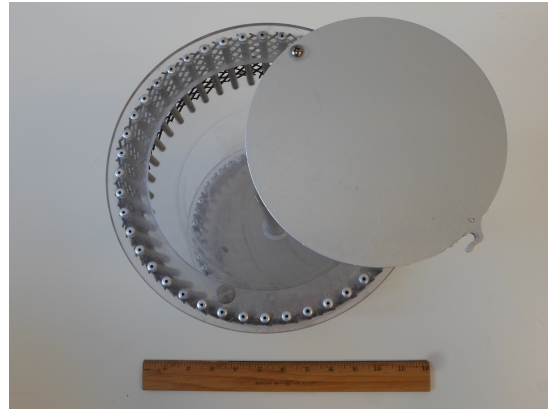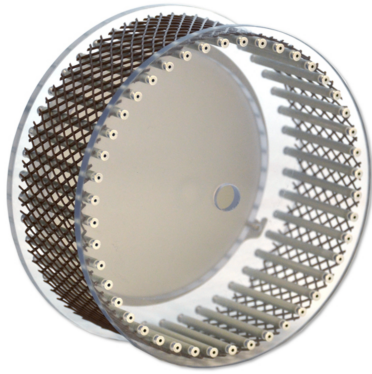

**Weight: 360gr (0.8lb)**  
**Wheel Diameter: 15.1cm (5.94") ID**  
**Wheel Diameter: 17.1cm (6.75") OD**  
**Wheel Width: 5.7cm (2.25") (int.)**  
**Wheel Width: 7cm (2.75") (ext.)**

B

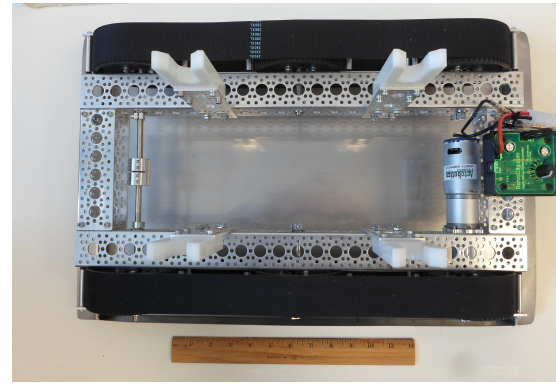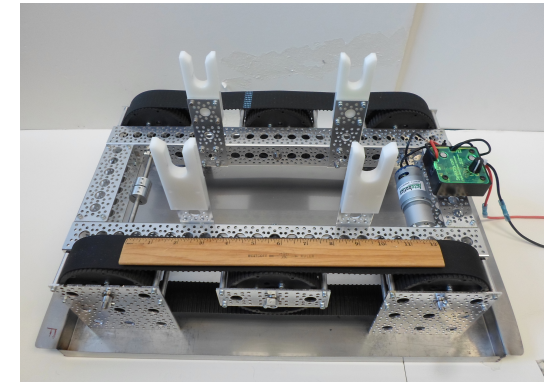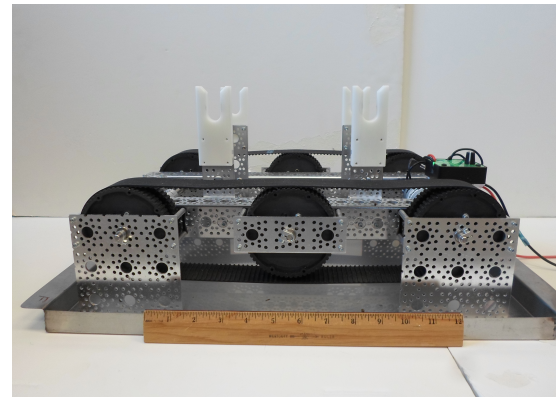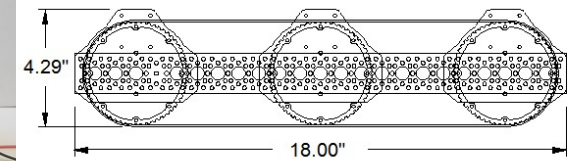

C

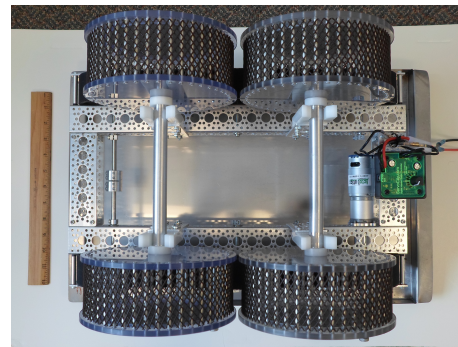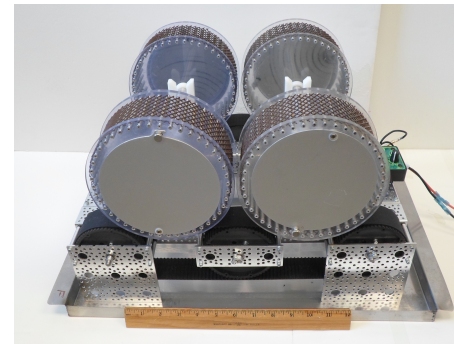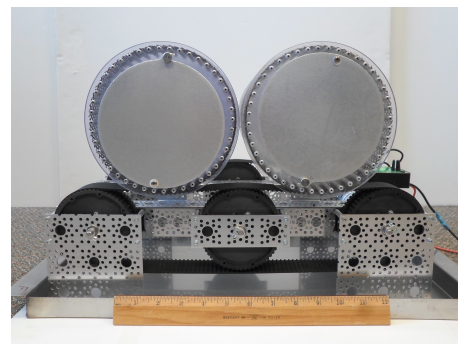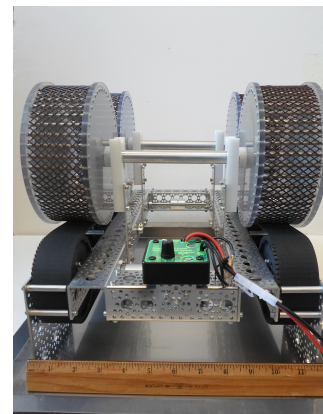

A

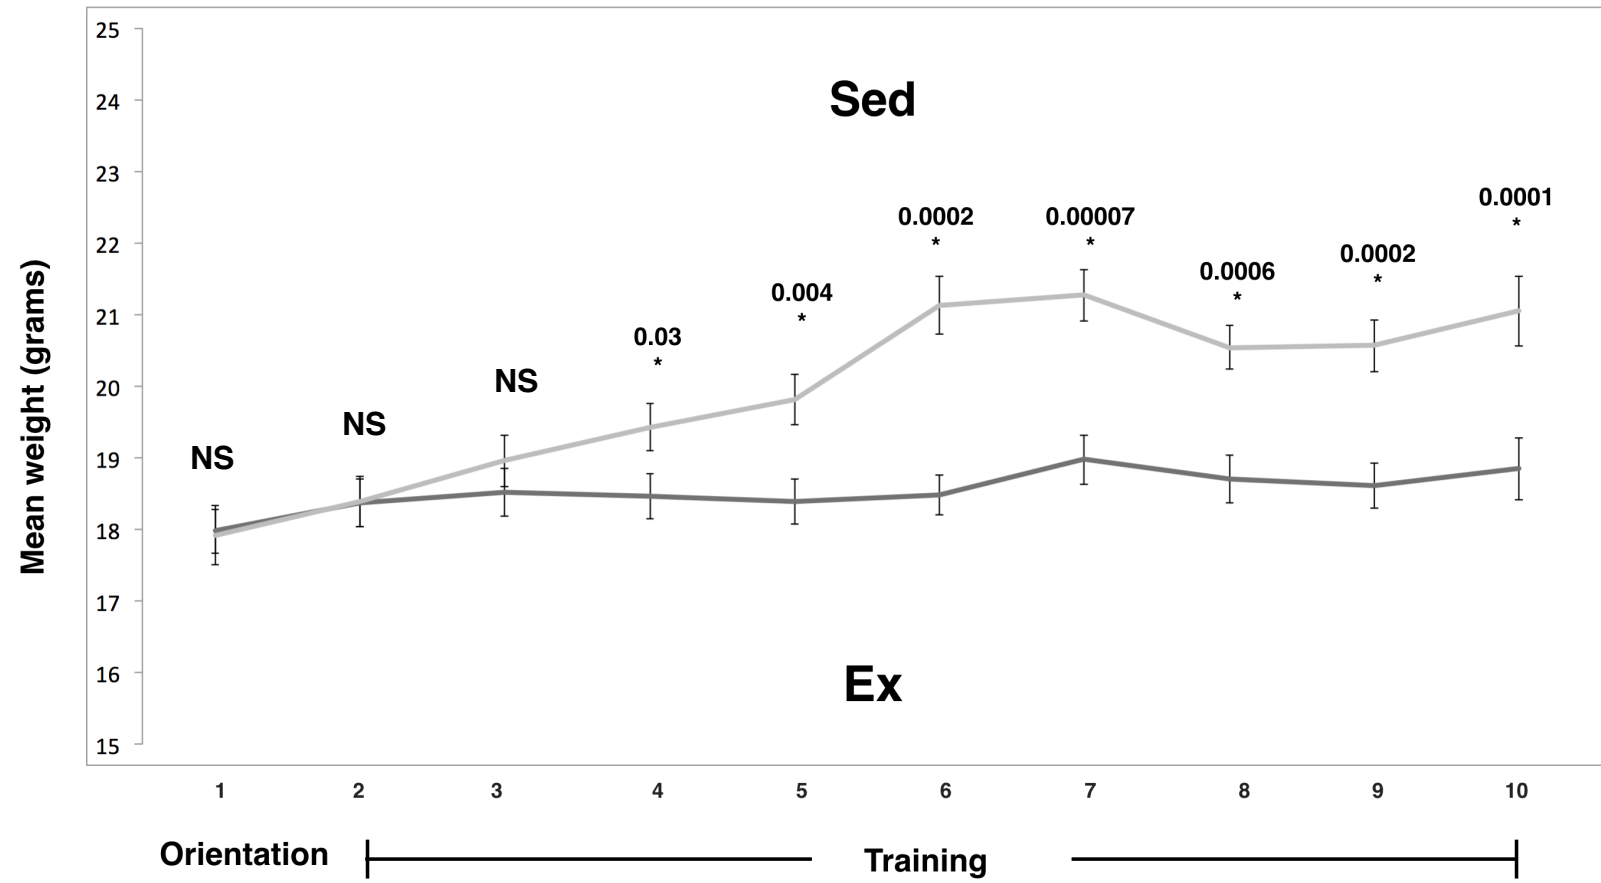

B

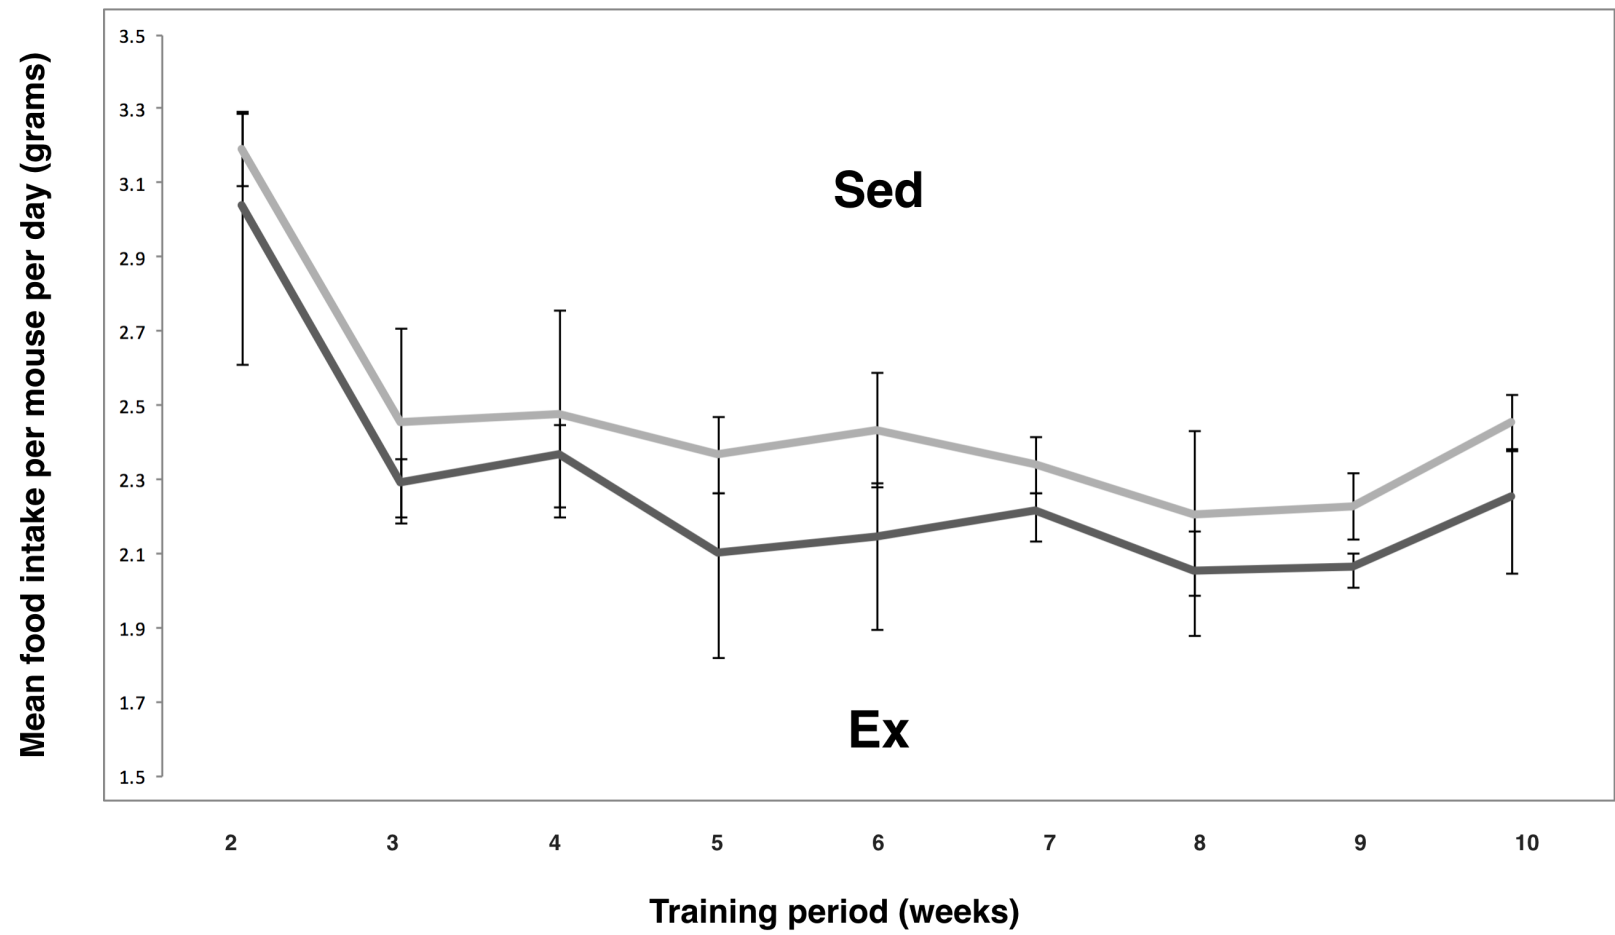

| Week     | Weekday | min |    | m/min | m   | Week     | Weekday | min |    | m/min | m   | Week     | Weekday | min |    | m/min | m   | Week        | Weekday | min |    | m/min | m   |
|----------|---------|-----|----|-------|-----|----------|---------|-----|----|-------|-----|----------|---------|-----|----|-------|-----|-------------|---------|-----|----|-------|-----|
| <b>1</b> | mon     | 10  | 10 | 4     | 40  | <b>4</b> | mon     | 18  | 10 | 6     | 128 | <b>6</b> | mon     | 22  | 4  | 6     | 196 | <b>8</b>    | mon     | 26  | 2  | 6     | 248 |
|          | tue     | 10  | 10 | 4     | 40  |          | tue     | 18  | 6  | 8     | 128 |          | tue     | 22  | 6  | 8     | 200 |             | tue     | 26  | 4  | 8     | 252 |
|          | wed     | 10  | 10 | 4     | 40  |          | tue     | 18  | 5  | 6     | 140 |          | wed     | 22  | 10 | 10    | 196 |             | wed     | 26  | 18 | 10    | 254 |
|          | thu     | 10  | 10 | 4     | 40  |          | wed     | 18  | 10 | 8     | 138 |          | thu     | 22  | 2  | 12    | 204 |             | thu     | 26  | 2  | 12    | 256 |
|          | fri     | 10  | 10 | 4     | 40  |          | thu     | 18  | 3  | 10    | 140 |          | fri     | 22  | 4  | 8     | 208 |             | fri     | 26  | 1  | 6     | 258 |
| <b>2</b> | mon     | 14  | 7  | 6     | 98  | <b>5</b> | mon     | 20  | 4  | 6     | 172 | <b>7</b> | mon     | 24  | 2  | 6     | 228 | <b>6189</b> |         |     |    |       |     |
|          | tue     | 14  | 7  | 6     | 98  |          | tue     | 20  | 6  | 8     | 156 |          | tue     | 24  | 4  | 8     | 228 |             |         |     |    |       |     |
|          | wed     | 14  | 5  | 6     | 102 |          | wed     | 20  | 8  | 10    | 161 |          | wed     | 24  | 16 | 10    | 230 |             |         |     |    |       |     |
|          | thu     | 14  | 9  | 8     | 92  |          | thu     | 20  | 7  | 10    | 164 |          | thu     | 24  | 2  | 12    | 234 |             |         |     |    |       |     |
|          | fri     | 14  | 5  | 6     | 92  |          | fri     | 20  | 1  | 12    | 164 |          | fri     | 24  | 17 | 10    | 234 |             |         |     |    |       |     |
| <b>3</b> | mon     | 16  | 8  | 6     | 118 | <b>5</b> | mon     | 20  | 4  | 6     | 172 | <b>7</b> | mon     | 24  | 2  | 6     | 228 | <b>6189</b> |         |     |    |       |     |
|          | tue     | 16  | 8  | 6     | 118 |          | tue     | 20  | 6  | 8     | 156 |          | tue     | 24  | 4  | 8     | 228 |             |         |     |    |       |     |
|          | wed     | 16  | 5  | 6     | 118 |          | wed     | 20  | 8  | 10    | 161 |          | wed     | 24  | 16 | 10    | 230 |             |         |     |    |       |     |
|          | thu     | 16  | 3  | 10    | 118 |          | thu     | 20  | 7  | 10    | 164 |          | thu     | 24  | 2  | 12    | 234 |             |         |     |    |       |     |
|          | fri     | 16  | 8  | 6     | 118 |          | fri     | 20  | 1  | 12    | 164 |          | fri     | 24  | 2  | 12    | 234 |             |         |     |    |       |     |
| <b>3</b> | mon     | 16  | 5  | 8     | 118 | <b>5</b> | mon     | 20  | 4  | 6     | 172 | <b>7</b> | mon     | 24  | 2  | 6     | 228 | <b>6189</b> |         |     |    |       |     |
|          | tue     | 16  | 8  | 6     | 118 |          | tue     | 20  | 6  | 8     | 156 |          | tue     | 24  | 4  | 8     | 228 |             |         |     |    |       |     |
|          | wed     | 16  | 3  | 10    | 118 |          | wed     | 20  | 8  | 10    | 161 |          | wed     | 24  | 16 | 10    | 230 |             |         |     |    |       |     |
|          | thu     | 16  | 5  | 8     | 118 |          | thu     | 20  | 7  | 10    | 164 |          | thu     | 24  | 2  | 12    | 234 |             |         |     |    |       |     |
|          | fri     | 16  | 8  | 6     | 118 |          | fri     | 20  | 1  | 12    | 164 |          | fri     | 24  | 17 | 10    | 234 |             |         |     |    |       |     |
| <b>3</b> | mon     | 16  | 3  | 10    | 118 | <b>5</b> | mon     | 20  | 4  | 6     | 172 | <b>7</b> | mon     | 24  | 2  | 6     | 228 | <b>6189</b> |         |     |    |       |     |
|          | tue     | 16  | 8  | 6     | 118 |          | tue     | 20  | 6  | 8     | 156 |          | tue     | 24  | 4  | 8     | 228 |             |         |     |    |       |     |
|          | wed     | 16  | 5  | 8     | 118 |          | wed     | 20  | 8  | 10    | 161 |          | wed     | 24  | 16 | 10    | 230 |             |         |     |    |       |     |
|          | thu     | 16  | 3  | 10    | 118 |          | thu     | 20  | 7  | 10    | 164 |          | thu     | 24  | 2  | 12    | 234 |             |         |     |    |       |     |
|          | fri     | 16  | 8  | 6     | 118 |          | fri     | 20  | 1  | 12    | 164 |          | fri     | 24  | 2  | 12    | 234 |             |         |     |    |       |     |
| <b>3</b> | mon     | 16  | 5  | 8     | 118 | <b>5</b> | mon     | 20  | 4  | 6     | 172 | <b>7</b> | mon     | 24  | 2  | 6     | 228 | <b>6189</b> |         |     |    |       |     |
|          | tue     | 16  | 8  | 6     | 118 |          | tue     | 20  | 6  | 8     | 156 |          | tue     | 24  | 4  | 8     | 228 |             |         |     |    |       |     |
|          | wed     | 16  | 3  | 10    | 118 |          | wed     | 20  | 8  | 10    | 161 |          | wed     | 24  | 16 | 10    | 230 |             |         |     |    |       |     |
|          | thu     | 16  | 5  | 8     | 118 |          | thu     | 20  | 7  | 10    | 164 |          | thu     | 24  | 2  | 12    | 234 |             |         |     |    |       |     |
|          | fri     | 16  | 8  | 6     | 118 |          | fri     | 20  | 1  | 12    | 164 |          | fri     | 24  | 17 | 10    | 234 |             |         |     |    |       |     |
| <b>3</b> | mon     | 16  | 3  | 10    | 118 | <b>5</b> | mon     | 20  | 4  | 6     | 172 | <b>7</b> | mon     | 24  | 2  | 6     | 228 | <b>6189</b> |         |     |    |       |     |
|          | tue     | 16  | 8  | 6     | 118 |          | tue     | 20  | 6  | 8     | 156 |          | tue     | 24  | 4  | 8     | 228 |             |         |     |    |       |     |
|          | wed     | 16  | 5  | 8     | 118 |          | wed     | 20  | 8  | 10    | 161 |          | wed     | 24  | 16 | 10    | 230 |             |         |     |    |       |     |
|          | thu     | 16  | 3  | 10    | 118 |          | thu     | 20  | 7  | 10    | 164 |          | thu     | 24  | 2  | 12    | 234 |             |         |     |    |       |     |
|          | fri     | 16  | 8  | 6     | 118 |          | fri     | 20  | 1  | 12    | 164 |          | fri     | 24  | 2  | 12    | 234 |             |         |     |    |       |     |

## Right Rear Leg Muscle mtDNA

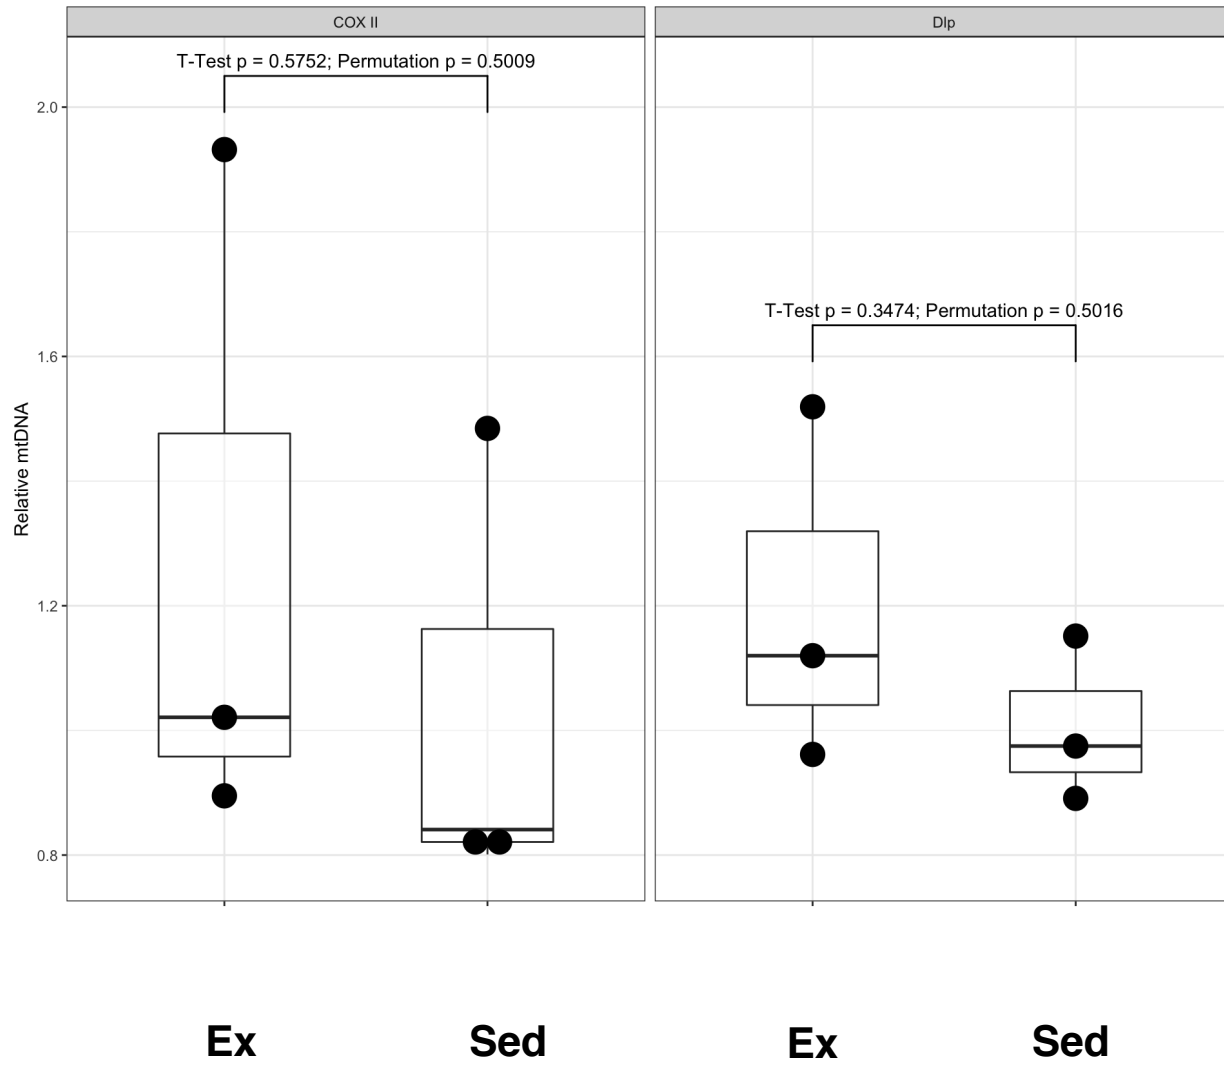

## Liver mtDNA

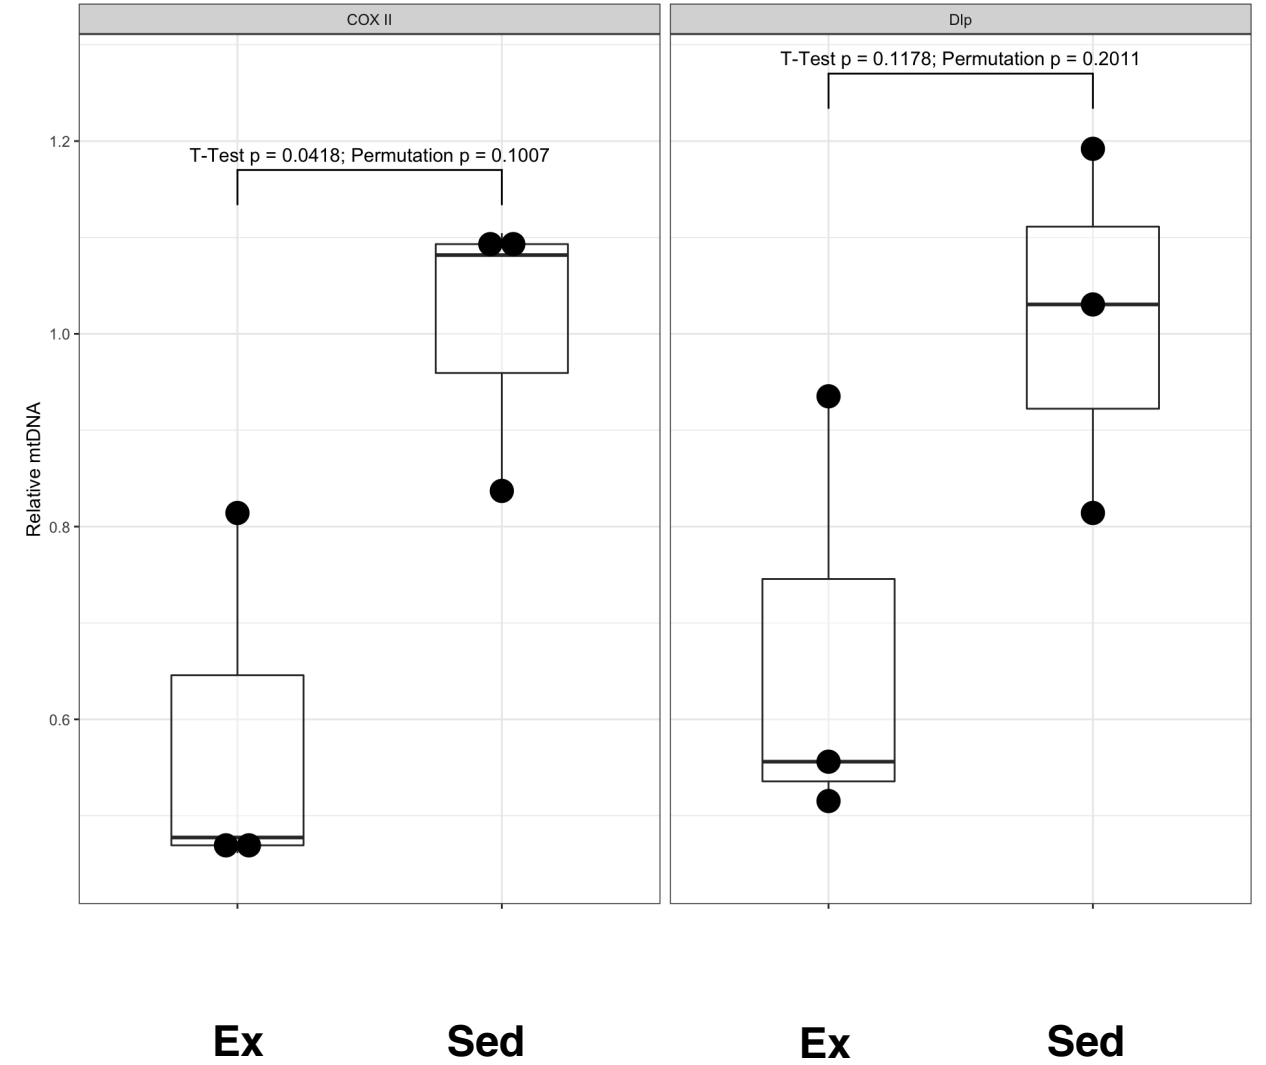



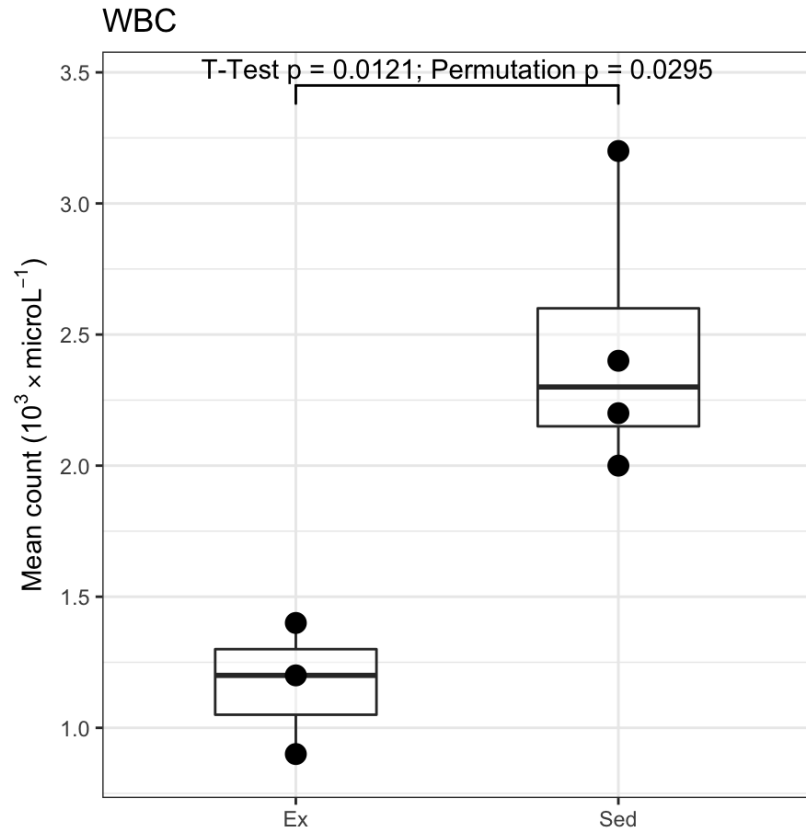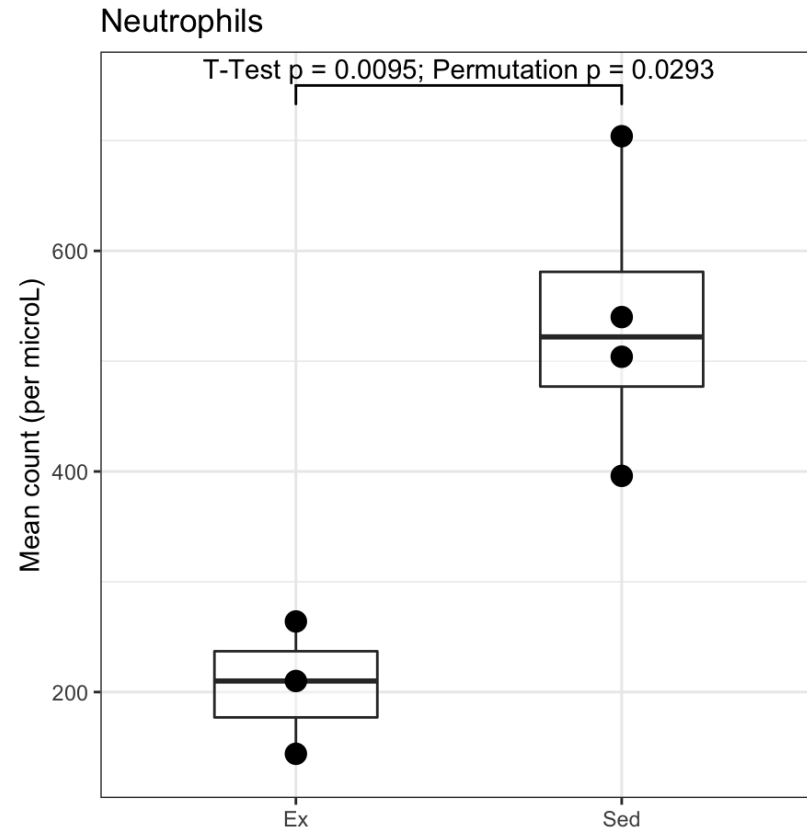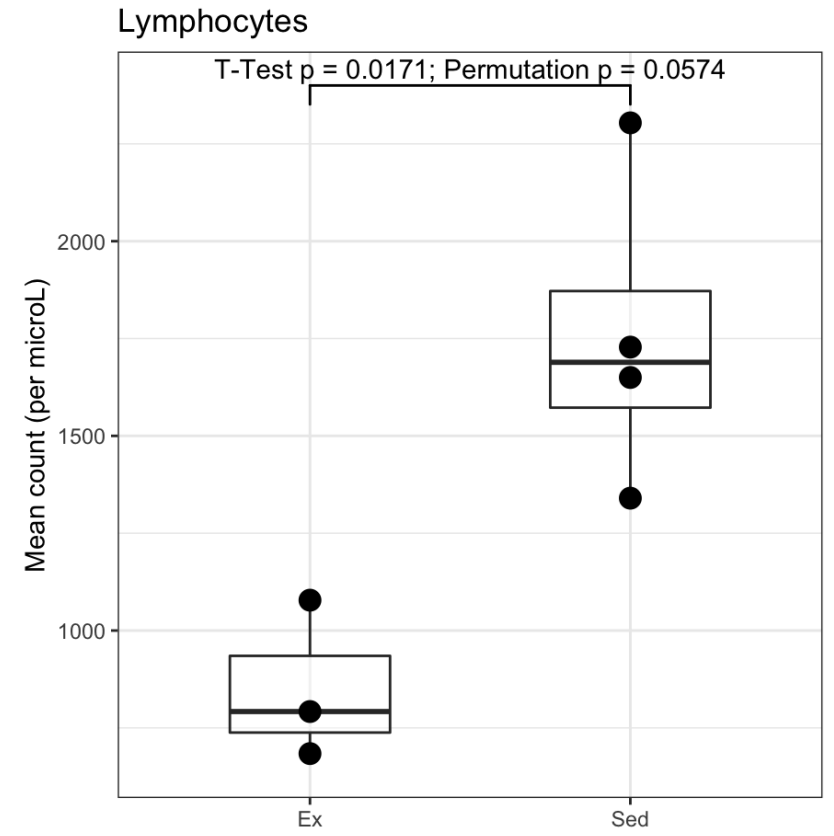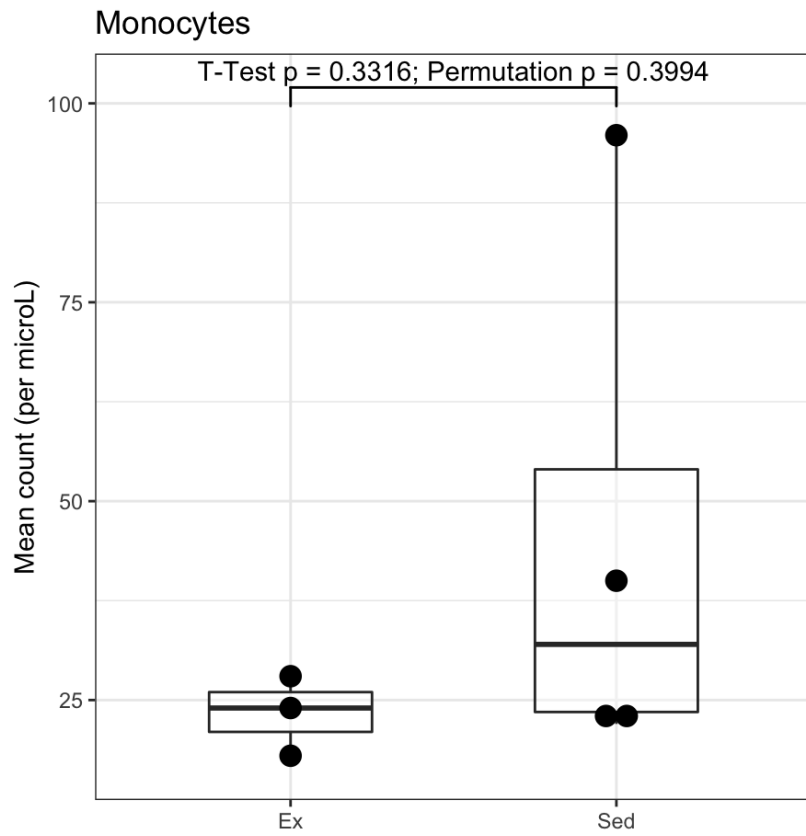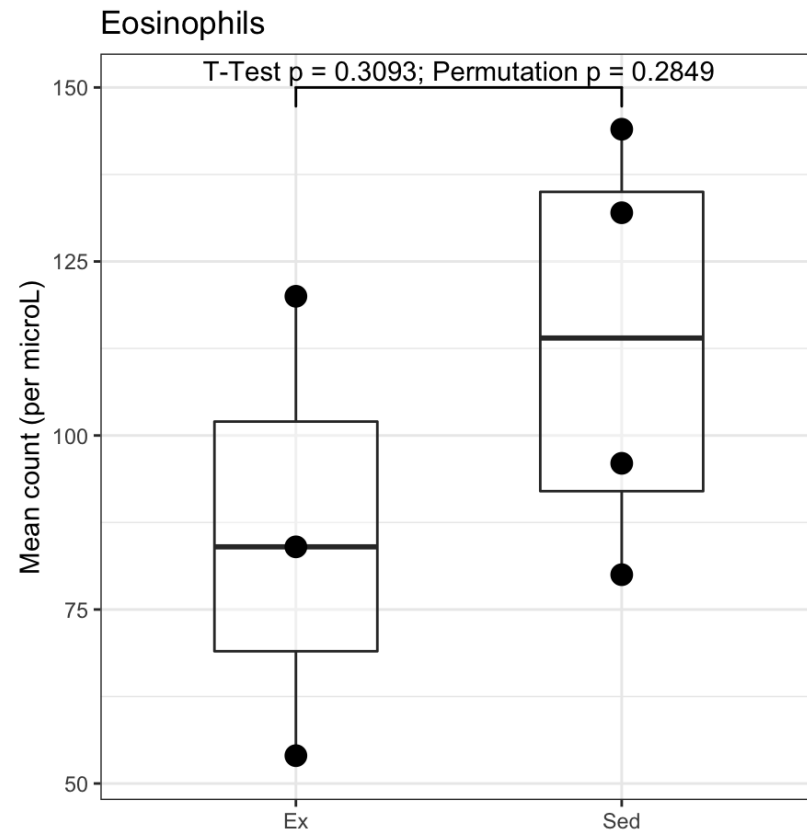

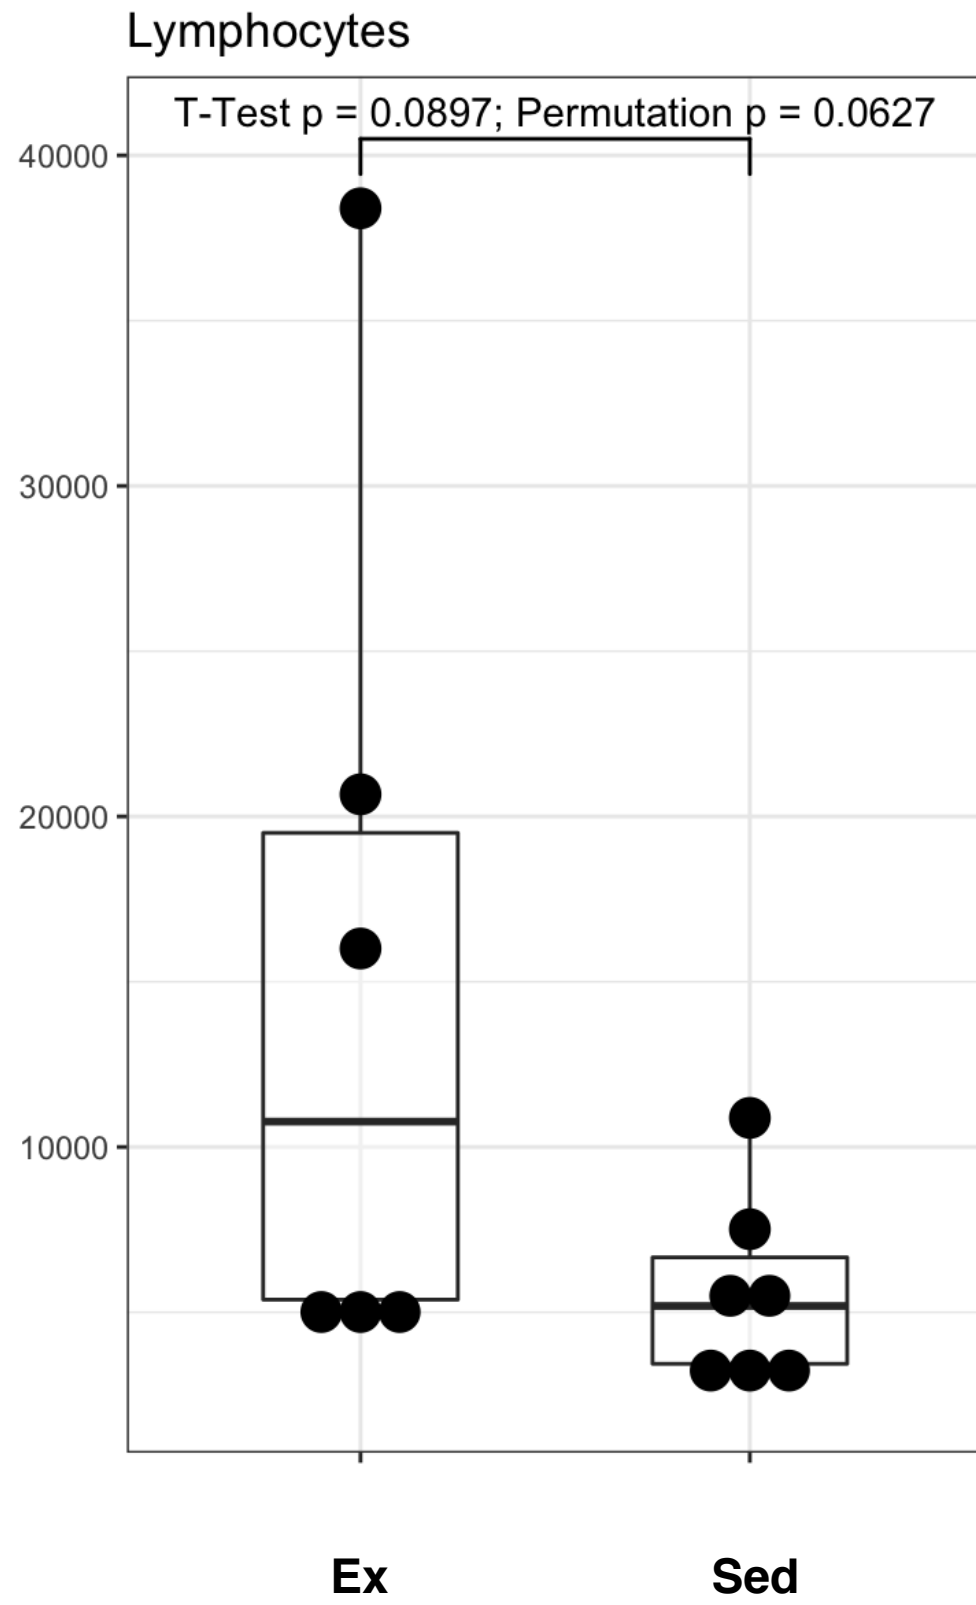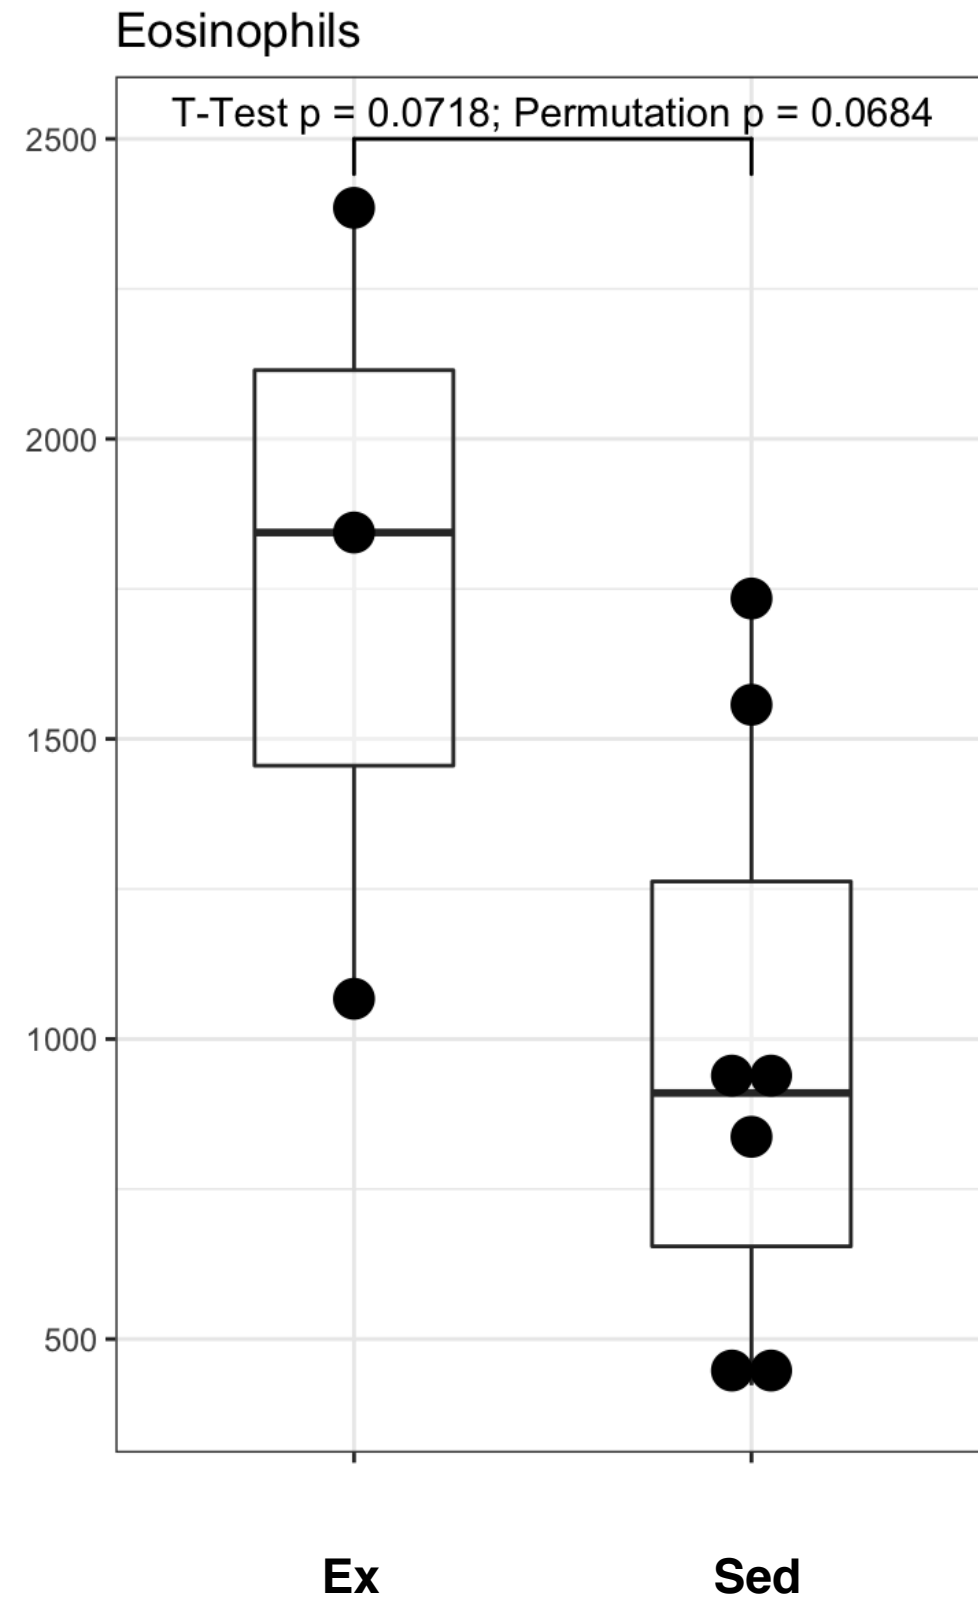

Supplement: 12885_2019_5745_MOESM1_ESM.pdf [file 12885_2019_5745_MOESM1_ESM.pdf]
